# Supplementary material for: Learning Shapes Spontaneous Activity Itinerating over Memorized States
Source: PLOS journal article supplement (doi:10.1371/journal.pone.0017432), 2011-03-08
Supplement: S1 (10.1371/journal.pone.0017432.s001) [file journal.pone.0017432.s001]

**A**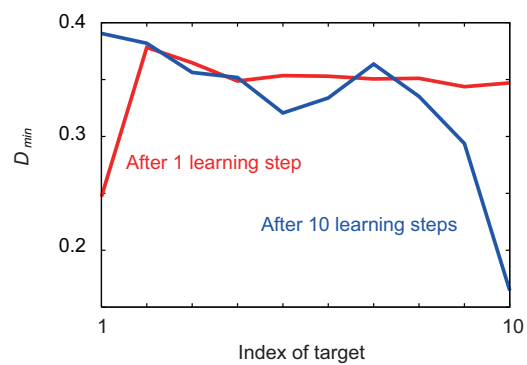**B**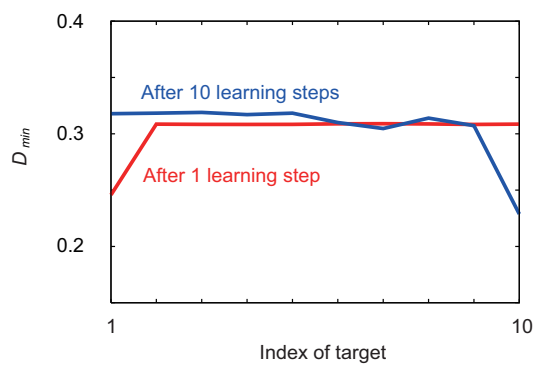

## Supporting Figure Legends

**Figure S : Change in the minimum distance between the activity and the target.** Change in the minimum distance between the output activity and the target during the learning process are plotted. The minimum distance  $D_{min}$  at  $\tau^{BS} = 1$  and  $\tau^{BS} = 128$  is plotted in Figs. A and B, respectively. Here,  $D_{min}$  is defined in the same manner as in Figure 9. Red and blue lines represent  $D_{min}$  after one and ten learning steps, respectively. The distance to one (or a few) target(s) is small, while in Figure 9, the distance to almost all the targets is small for  $\tau^{BS} = 8$ .
